# Supplementary material
Source: HighWire-hosted journal article supplement (http://www.ajnr.org/highwire/filestream/52614/field_highwire_adjunct_files/0/14-00976.pdf)
Supplement: 14-00976.pdf [file 14-00976.pdf]

**On-line Table 1: Demographic, clinical, and genetic features of the patients with OPA1-DOA and LHON and healthy subjects studied**

|                               | Sex        | Age (yr) | Age at Onset (yr) | Disease Duration (yr) | Extravascular Symptoms | Idebenone Therapy | Visual Recovery | Mutation <sup>a</sup>            | Haplogroup |
|-------------------------------|------------|----------|-------------------|-----------------------|------------------------|-------------------|-----------------|----------------------------------|------------|
| <b>Patients with OPA1-DOA</b> |            |          |                   |                       |                        |                   |                 |                                  |            |
| 1                             | M          | 60       | 6                 | 54                    | None                   | No                | No              | c.2729 T>A (Val910Asp)           | H          |
| 2                             | M          | 54       | 6                 | 48                    | None                   | No                | No              | c.2729 T>A (Val910Asp)           | H          |
| 3                             | M          | 54       | 30                | 24                    | None                   | Yes               | No              | c.703 C>T (Arg235X)              | J          |
| 4                             | F          | 43       | 0                 | 43                    | Deafness, PNP          | No                | No              | c.893G>A (Ser298Asn)             | H          |
| 5                             | M          | 42       | 5                 | 37                    | None                   | Yes               | No              | c.984 + 3A>T                     | L          |
| 6                             | M          | 40       | 4                 | 27                    | CPEO, deafness, PNP    | Yes               | No              | c.1316G>T (Gly439Val)            | HV         |
| 7                             | F          | 30       | 16                | 14                    | Deafness               | Yes               | No              | c.869 G>A p.Arg290Gln            | T          |
| 8                             | F          | 42       | 0                 | 42                    | None                   | No                | No              | c.2823_26delAGTT                 | H          |
| 9                             | M          | 21       | 6                 | 15                    | None                   | Yes               | No              | c.2823_26 delAGTT p.Lys941fsX966 | H          |
| 10                            | M          | 25       | 6                 | 19                    | None                   | No                | No              | c.2729 T>A (Val910Asp)           | J          |
| 11                            | F          | 38       | 6                 | 32                    | None                   | No                | No              | c.1770 G>A; splice defect        | HV         |
| 12                            | F          | 39       | 6                 | 34                    | None                   | Yes               | No              | c.2819-2 A>C; splice defect      | H          |
| 13                            | F          | 33       | 3                 | 30                    | None                   | Yes               | No              | c.2819-2 A>C; splice defect      | H          |
| 14                            | M          | 46       | 0                 | 46                    | None                   | No                | No              | c.984 + 3 A> T; splice defect    | H          |
| 15                            | M          | 43       | 0                 | 43                    | None                   | No                | No              | c.2196_2197dup AG > AC (×22)     | NA         |
| 16                            | F          | 50       | ND                | ND                    | None                   | No                | No              | c.1669 C>T (R577X)               | H          |
| 17                            | M          | 24       | 6                 | 18                    | None                   | Yes               | No              | c.1669 C>T (R577X)               | H          |
| 18                            | F          | 25       | 1                 | 24                    | None                   | No                | No              | c.1778 T>C; p.Leu593Pro          | H          |
| 19                            | M          | 23       | 6                 | 17                    | None                   | Yes               | No              | c.1807G>C; p.Asp603His           | U          |
| Mean                          | —          | 39 ± 12  | 6 ± 8             | 31 ± 13               | —                      | —                 | —               | —                                | —          |
| <b>Patients with LHON</b>     |            |          |                   |                       |                        |                   |                 |                                  |            |
| 1                             | M          | 27       | 16                | 11                    | None                   | Yes               | No              | 3460_ND1                         | H          |
| 2                             | M          | 29       | 17                | 12                    | None                   | Yes               | Yes             | 14484_ND6                        | X          |
| 3                             | M          | 31       | 14                | 17                    | None                   | No                | No              | 11778_ND4                        | J          |
| 4                             | F          | 42       | 34                | 8                     | None                   | Yes               | Yes             | 11778_ND4                        | W          |
| 5                             | M          | 29       | 28                | 30                    | None                   | Yes               | No              | 11778_ND4                        | H          |
| 6                             | M          | 33       | 26                | 33                    | None                   | Yes               | No              | 11778_ND4                        | H          |
| 7                             | F          | 42       | 34                | 8                     | None                   | No                | No              | 11778_ND4                        | H          |
| 8                             | F          | 45       | 35                | 10                    | None                   | No                | No              | 11778_ND4                        | H          |
| 9                             | M          | 29       | 14                | 15                    | None                   | Yes               | Yes             | 11778_ND4                        | H          |
| 10                            | M          | 35       | 26                | 9                     | None                   | Yes               | No              | 11778_ND4                        | H          |
| 11                            | M          | 26       | 14                | 12                    | None                   | Yes               | Yes             | 3460_ND1                         | H          |
| 12                            | M          | 48       | 16                | 32                    | None                   | No                | No              | 11778_ND4                        | K          |
| 13                            | M          | 53       | 16                | 37                    | None                   | No                | No              | 11778_ND4                        | N          |
| 14                            | F          | 55       | 12                | 43                    | None                   | Yes               | No              | 3460_ND1                         | K          |
| 15                            | F          | 43       | 30                | 13                    | None                   | Yes               | No              | 11778_ND4                        | U          |
| 16                            | M          | 43       | 6                 | 37                    | None                   | No                | No              | 11778_ND4                        | U          |
| 17                            | M          | 25       | 24                | 1                     | None                   | Yes               | No              | 11778_ND4                        | NA         |
| Mean                          | —          | 37 ± 10  | 21 ± 9            | 19 ± 13               | —                      | —                 | —               | —                                | —          |
| Healthy controls (19)         | 8:11 (M/F) | 37 ± 10  | —                 | —                     | —                      | —                 | —               | —                                | —          |

**Note.**—CPEO indicates chronic progressive external ophthalmoplegia; PNP, polynuropathy (confirmed by nerve-conduction study); ND, not definable (because mild optic atrophy was diagnosed by a routine ophthalmologic evaluation); NA, not available; —, not applicable.

<sup>a</sup> Missense mutations are reported in italics, while mutations leading to haploinsufficiency are reported in Roman type.

**On-line Table 2: Ophthalmologic characteristics of the patients studied with OPAI-DOA and LHON**

|                               | Visual Acuity |             | Right Eye Retinal Nerve Fiber Layer Thickness (μm) |              |               |               | Left Eye Retinal Nerve Fiber Layer Thickness (μm) |               |              |               |               |               |
|-------------------------------|---------------|-------------|----------------------------------------------------|--------------|---------------|---------------|---------------------------------------------------|---------------|--------------|---------------|---------------|---------------|
|                               | Right Eye     | Left Eye    | Average                                            | Temporal     | Superior      | Nasal         | Inferior                                          | Average       | Temporal     | Superior      | Nasal         | Inferior      |
| <b>Patients with OPAI-DOA</b> |               |             |                                                    |              |               |               |                                                   |               |              |               |               |               |
| 1                             | 0.2           | 0.6         | 56.2                                               | 34           | 65            | 51            | 74                                                | 61.93         | 35           | 85            | 47            | 80            |
| 2                             | 0.1           | 0.05        | NA                                                 | NA           | NA            | NA            | NA                                                | NA            | NA           | NA            | NA            | NA            |
| 3                             | 0.63          | 0.2         | 58.13                                              | 34           | 80            | 54            | 65                                                | 53.67         | 31           | 76            | 51            | 57            |
| 4                             | 0.05          | 0.05        | 43.02                                              | 25           | 56            | 39            | 52                                                | 46.14         | 39           | 58            | 43            | 44            |
| 5                             | 0.01          | 0.06        | 53.71                                              | 47           | 42            | 49            | 77                                                | 57.16         | 44           | 71            | 36            | 78            |
| 6                             | 0.05          | 0.1         | 51                                                 | 59           | 44            | 33            | 68                                                | NA            | NA           | NA            | NA            | NA            |
| 7                             | 0.4           | 0.3         | 60.76                                              | 38           | 67            | 42            | 96                                                | 56.26         | 32           | 62            | 40            | 91            |
| 8                             | 0.63          | 0.63        | 68.21                                              | 29           | 90            | 74            | 80                                                | 70.09         | 31           | 93            | 67            | 89            |
| 9                             | 0.12          | 0.12        | 59.02                                              | 38           | 88            | 50            | 60                                                | 54.23         | 21           | 84            | 54            | 58            |
| 10                            | 0.15          | 0.12        | 68.31                                              | 39           | 83            | 56            | 95                                                | 70.7          | 35           | 113           | 47            | 88            |
| 11                            | 0.25          | 0.2         | NA                                                 | NA           | NA            | NA            | NA                                                | NA            | NA           | NA            | NA            | NA            |
| 12                            | 0.32          | 0.4         | 82.71                                              | 31           | 101           | 105           | 93                                                | 72.66         | 26           | 102           | 81            | 82            |
| 13                            | 0.125         | 0.1         | 65.46                                              | 36           | 94            | 68            | 64                                                | 63.89         | 34           | 88            | 60            | 73            |
| 14                            | 0.15          | 0.15        | 64.74                                              | 41           | 83            | 58            | 77                                                | 61.98         | 32           | 89            | 57            | 70            |
| 15                            | 0.6           | 0.6         | 66.4                                               | 35           | 101           | 50            | 80                                                | 72.49         | 32           | 112           | 68            | 79            |
| 16                            | 0.6           | 0.6         | NA                                                 | NA           | NA            | NA            | NA                                                | NA            | NA           | NA            | NA            | NA            |
| 17                            | 0.2           | 0.25        | 66.4                                               | 35           | 101           | 50            | 80                                                | 72.49         | 32           | 112           | 68            | 79            |
| 18                            | 0.05          | 0.05        | 51.71                                              | 31           | 60            | 50            | 66                                                | 42.55         | 31           | 54            | 39            | 47            |
| 19                            | 0.05          | 0.01        | 60.73                                              | 33           | 66            | 71            | 85                                                | 43.18         | 36           | 53            | 41            | 43            |
| Mean                          | 0.24 ± 0.22   | 0.23 ± 0.21 | 61.03 ± 9.19                                       | 36.56 ± 7.86 | 76.31 ± 19.65 | 56.25 ± 17    | 75.75 ± 12.77                                     | 59.96 ± 10.64 | 32.73 ± 5.23 | 83.47 ± 20.88 | 53.27 ± 13.28 | 70.53 ± 16.58 |
| <b>Patients with LHON</b>     |               |             |                                                    |              |               |               |                                                   |               |              |               |               |               |
| 1                             | 0.05          | 0.05        | 47.3                                               | 45           | 61            | 35            | 48                                                | 49            | 37           | 65            | 44            | 50            |
| 2                             | 0.4           | 0.16        | 41.06                                              | 29           | 45            | 42            | 48                                                | 54.48         | 57           | 71            | 44            | 47            |
| 3                             | 0.0025        | 0.0025      | 53.3                                               | 43           | 50            | 56            | 64                                                | 48.48         | 30           | 70            | 39            | 54            |
| 4                             | 0.3           | 1           | 97.43                                              | 43           | 123           | 91            | 133                                               | 97.56         | 37           | 123           | 88            | 142           |
| 5                             | 0.01          | 0.01        | 41.44                                              | 33           | 53            | 27            | 53                                                | 53.36         | 38           | 64            | 46            | 65            |
| 6                             | 0.01          | 0.01        | 53.53                                              | 37           | 51            | 65            | 60                                                | 48.37         | 37           | 57            | 39            | 60            |
| 7                             | 0.0025        | 0.03        | NA                                                 | NA           | NA            | NA            | NA                                                | NA            | NA           | NA            | NA            | NA            |
| 8                             | 0.01          | 0.01        | 47.59                                              | 35           | 50            | 56            | 50                                                | 45.16         | 38           | 49            | 49            | 45            |
| 9                             | 0.2           | 0.125       | 51.8                                               | 31           | 69            | 49            | 58                                                | 56.38         | 33           | 85            | 52            | 56            |
| 10                            | 0.005         | 0.05        | 67.65                                              | 56           | 82            | 55            | 78                                                | 63.08         | 44           | 82            | 61            | 65            |
| 11                            | 0.05          | 0.01        | 52.14                                              | 40           | 61            | 44            | 64                                                | 28.41         | 23           | 53            | 23            | 14            |
| 12                            | 0.04          | 0.02        | 61.47                                              | 31           | 86            | 50            | 78                                                | 58.47         | 34           | 72            | 52            | 76            |
| 13                            | 0.02          | 0.5         | 50.77                                              | 33           | 61            | 41            | 68                                                | 65.2          | 33           | 69            | 65            | 95            |
| 14                            | 0.1           | 0.05        | 49.28                                              | 40           | 59            | 45            | 52                                                | 47.79         | 28           | 66            | 43            | 54            |
| 15                            | 0.01          | 0.01        | NA                                                 | NA           | NA            | NA            | NA                                                | NA            | NA           | NA            | NA            | NA            |
| 16                            | 1             | 0.5         | 73.23                                              | 32           | 106           | 67            | 88                                                | 71.53         | 25           | 106           | 73            | 83            |
| 17                            | 0.05          | 0.08        | 79.27                                              | 38           | 107           | 99            | 73                                                | 84.95         | 41           | 106           | 96            | 97            |
| Mean                          | 0.13 ± 0.25   | 0.15 ± 0.27 | 57.81 ± 15.52                                      | 37.73 ± 7.10 | 70.93 ± 24.35 | 54.80 ± 19.47 | 67.67 ± 21.79                                     | 58.15 ± 16.90 | 35.67 ± 8.24 | 75.87 ± 21.10 | 54.27 ± 19.42 | 66.87 ± 29.45 |

**Note:**—NA indicates not available.

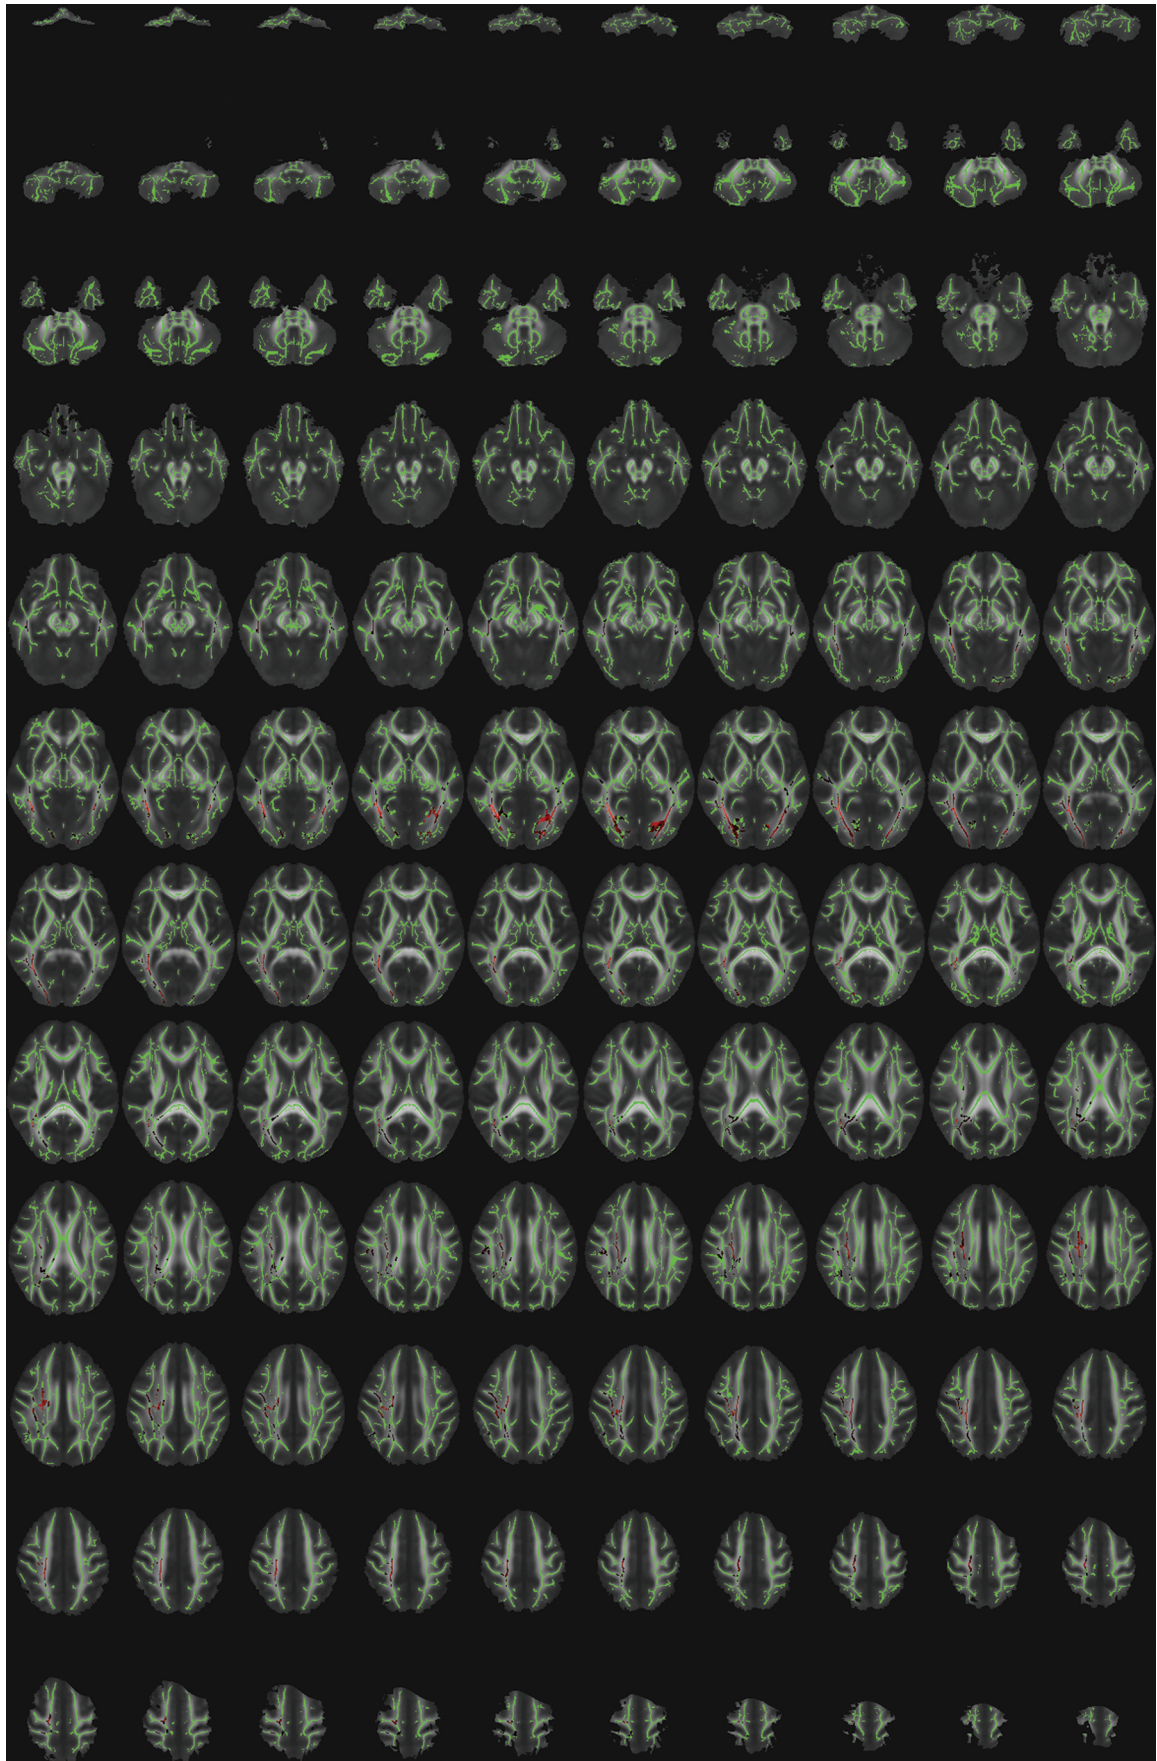

**ON-LINE FIG 1.** LHON FA < control FA: all axial sections.

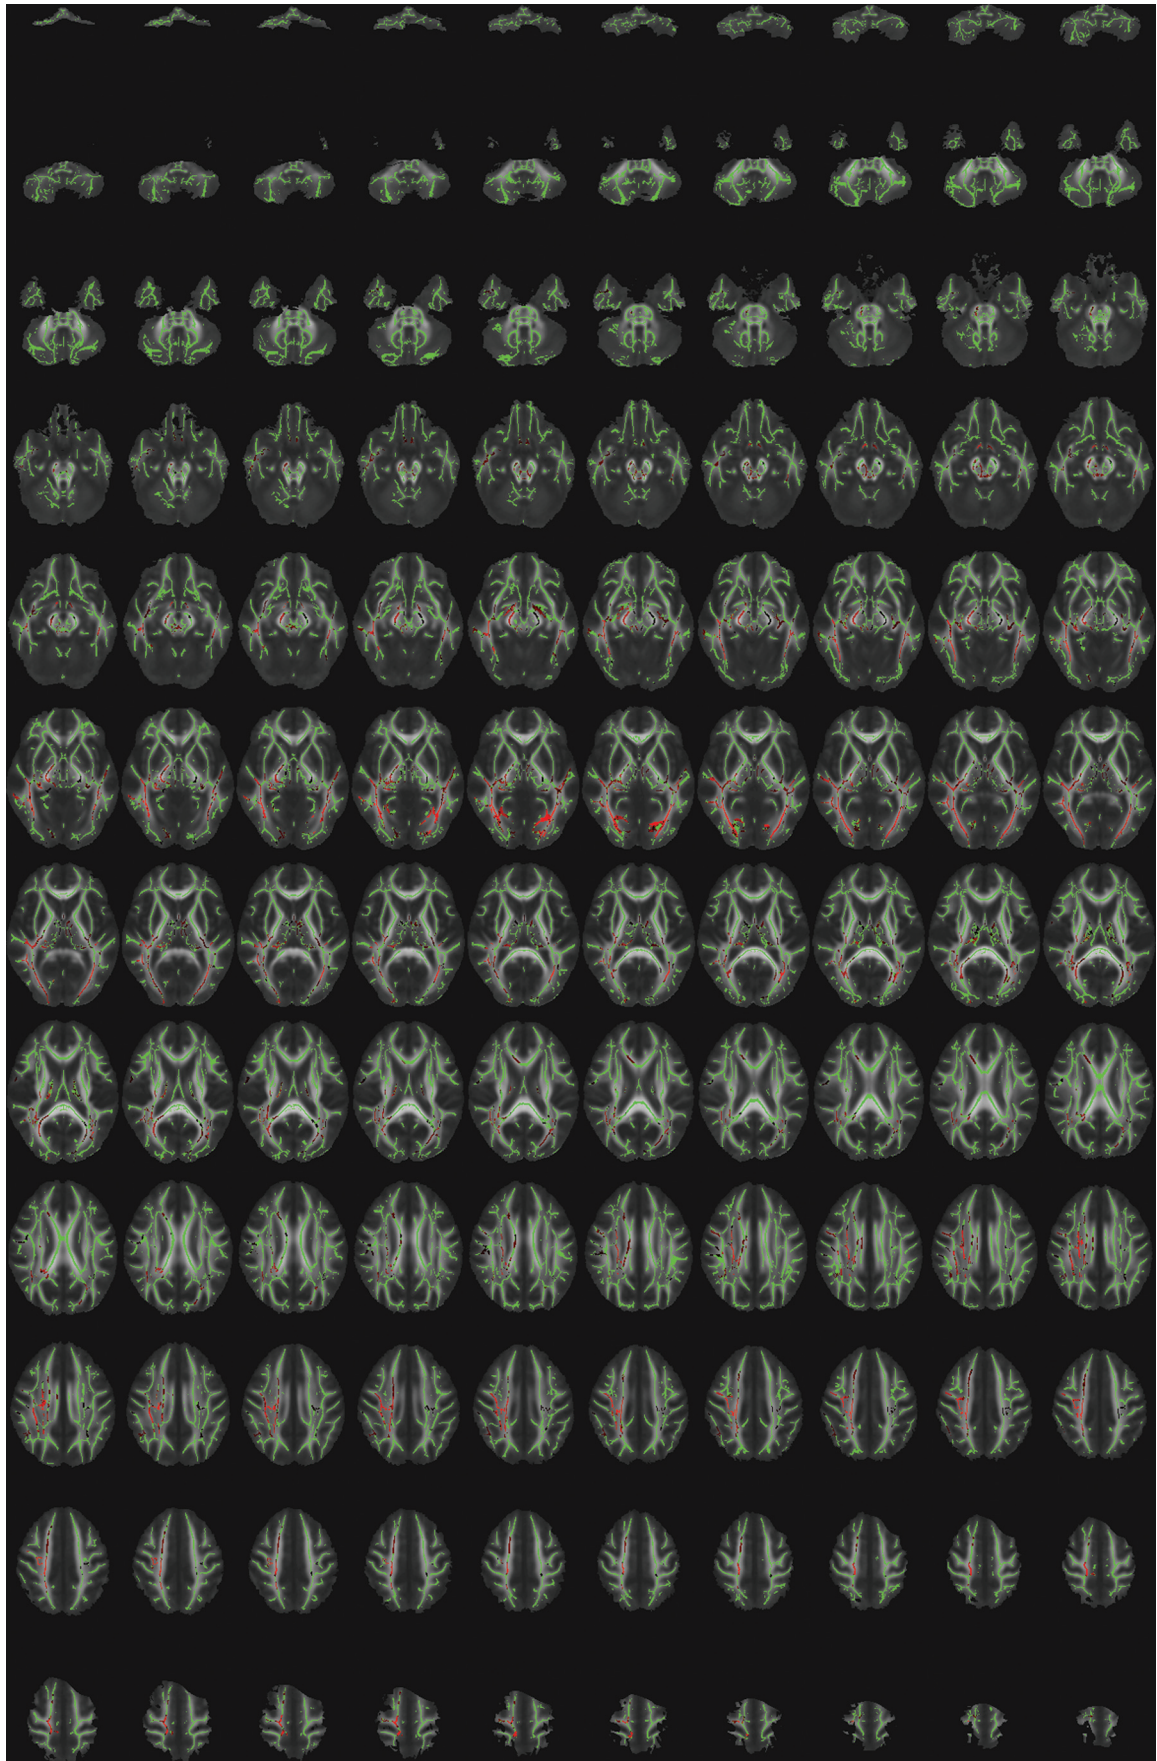

**ON-LINE FIG 2.** OPA1-DOA FA < control FA: all axial sections.

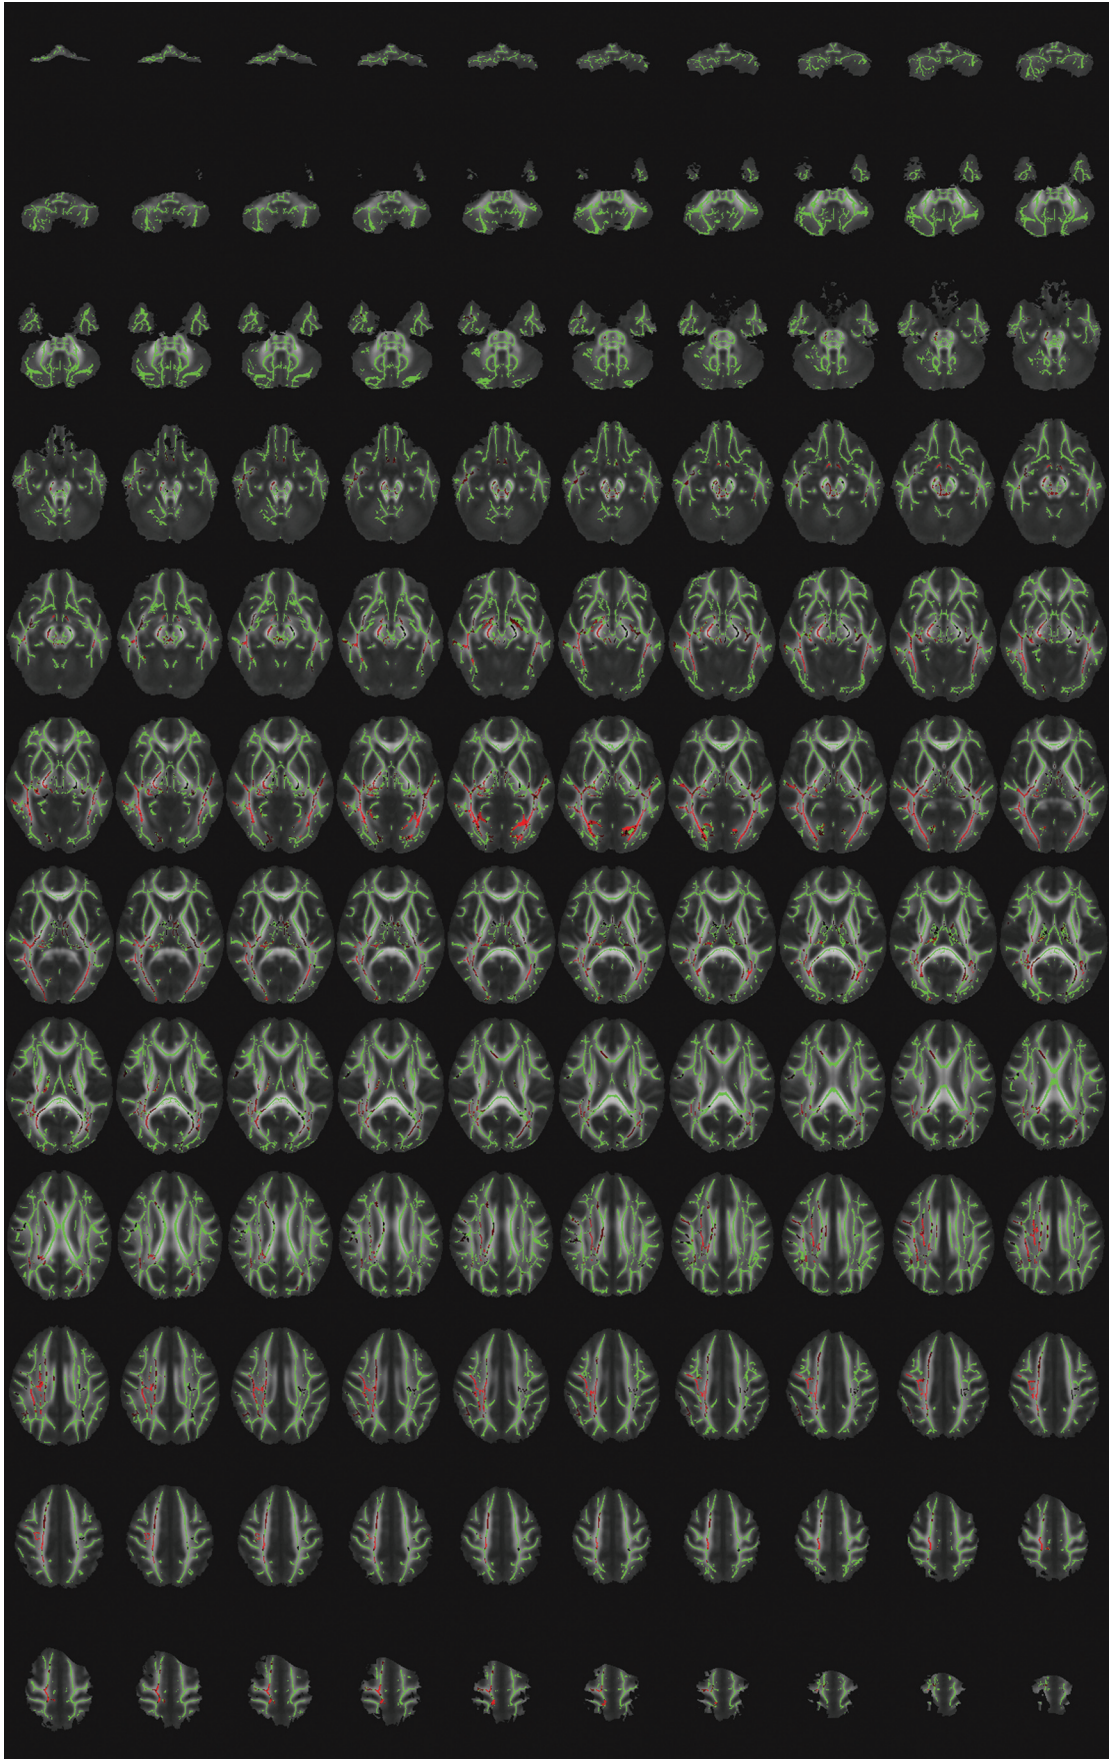

**ON-LINE FIG 3.** Pure OPA1-DOA FA < control FA: all axial sections.

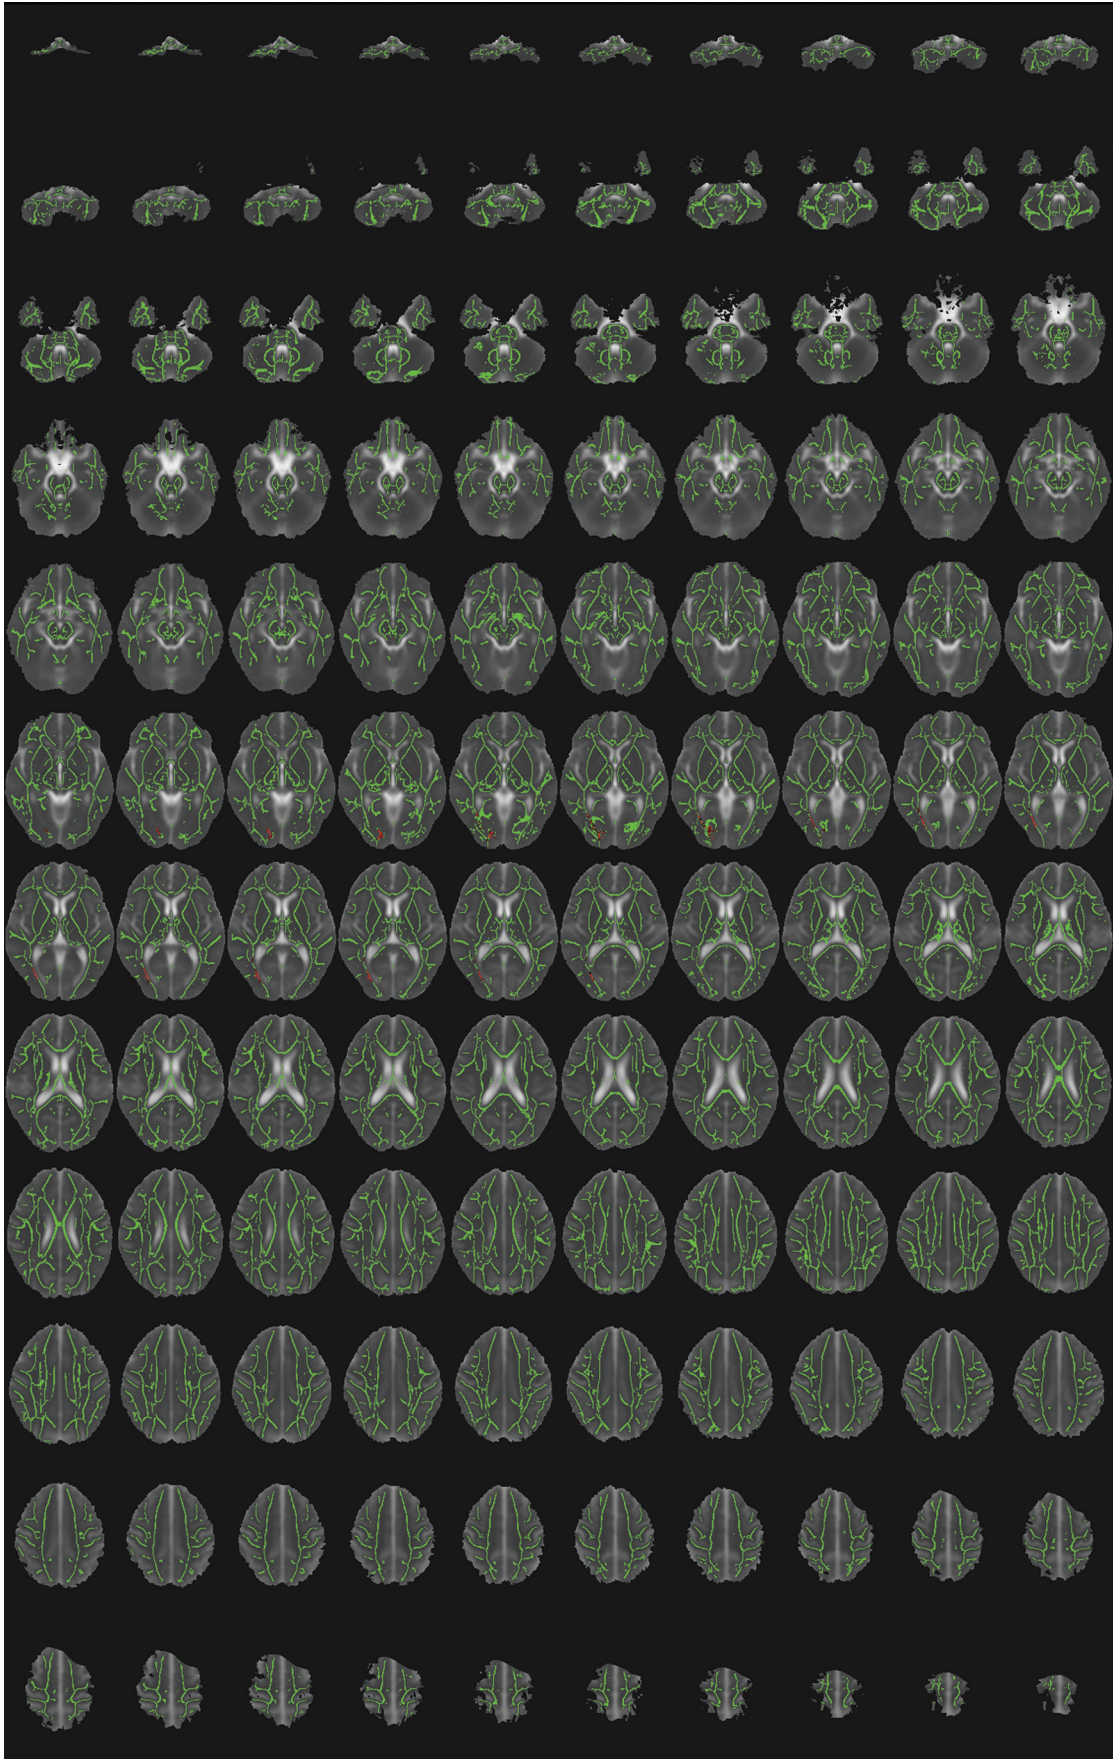

**ON-LINE FIG 4.** LHON MD > control MD: all axial sections.

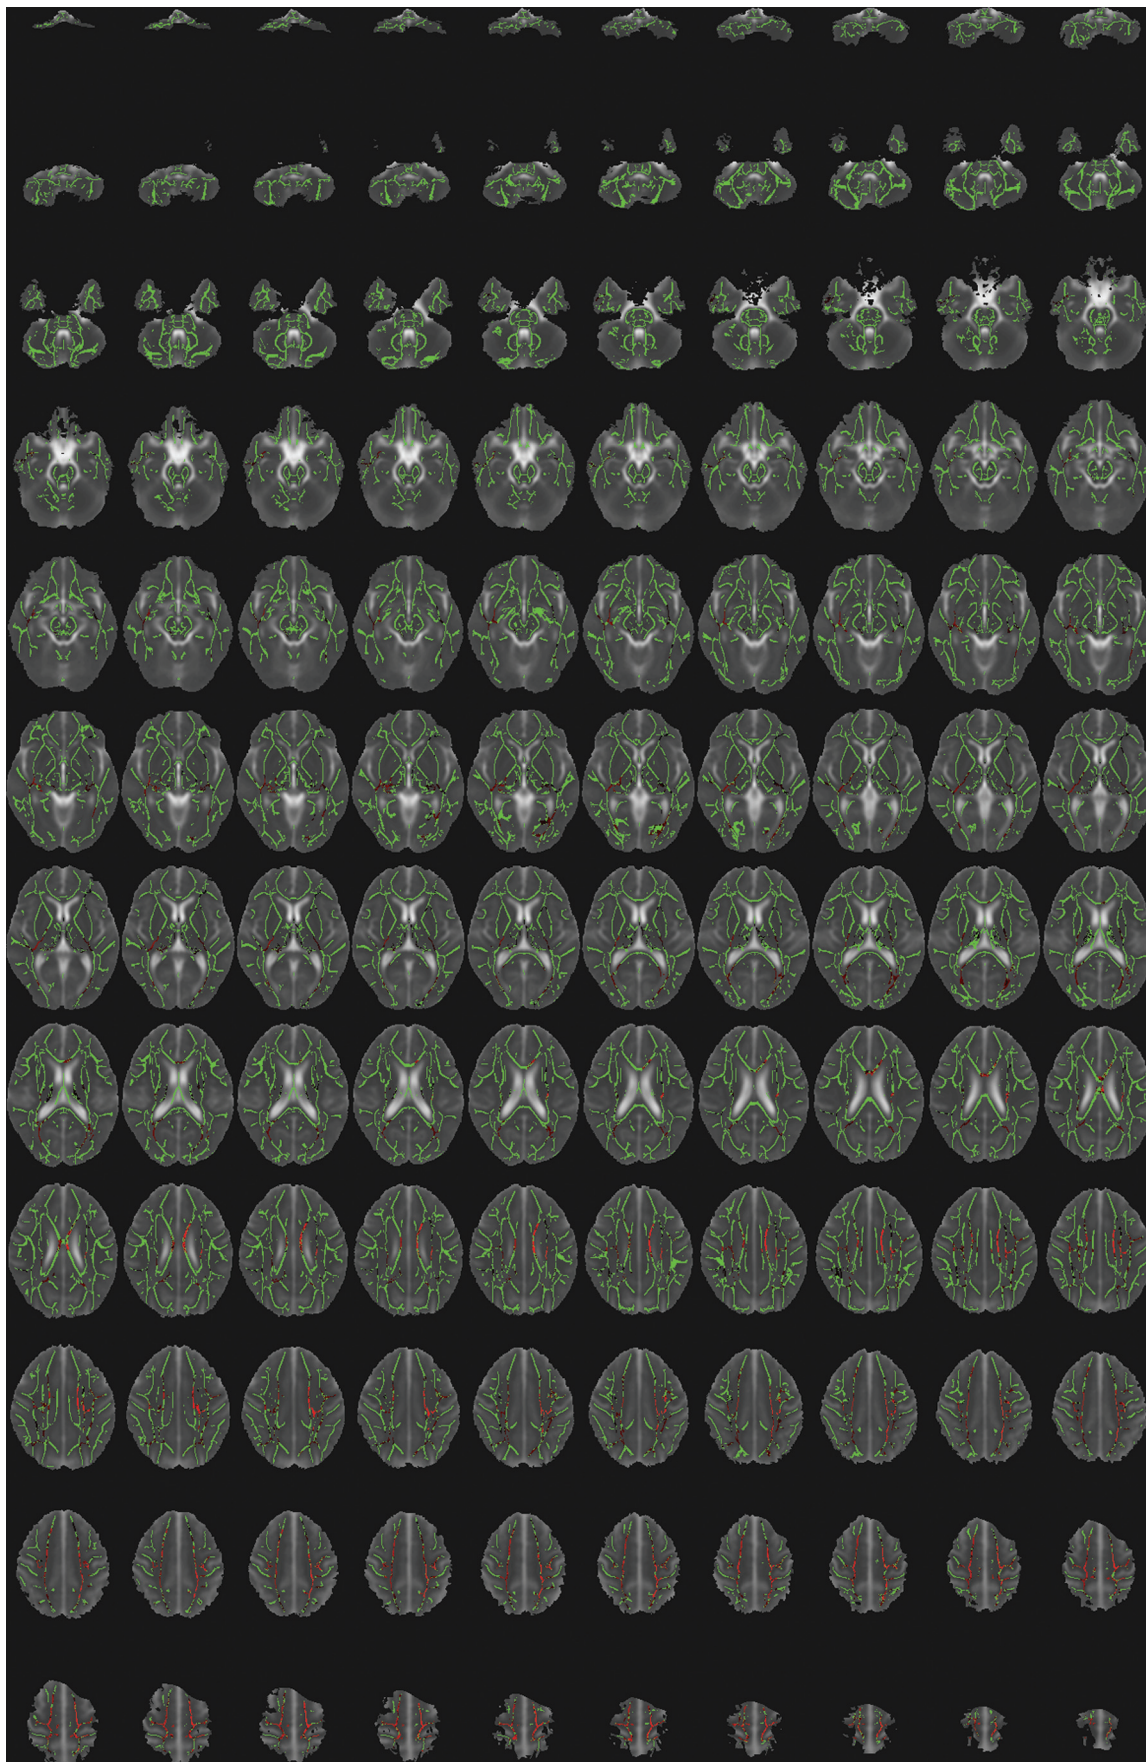

**ON-LINE FIG 5.** *OPA1*-DOA MD > control MD: all axial sections.

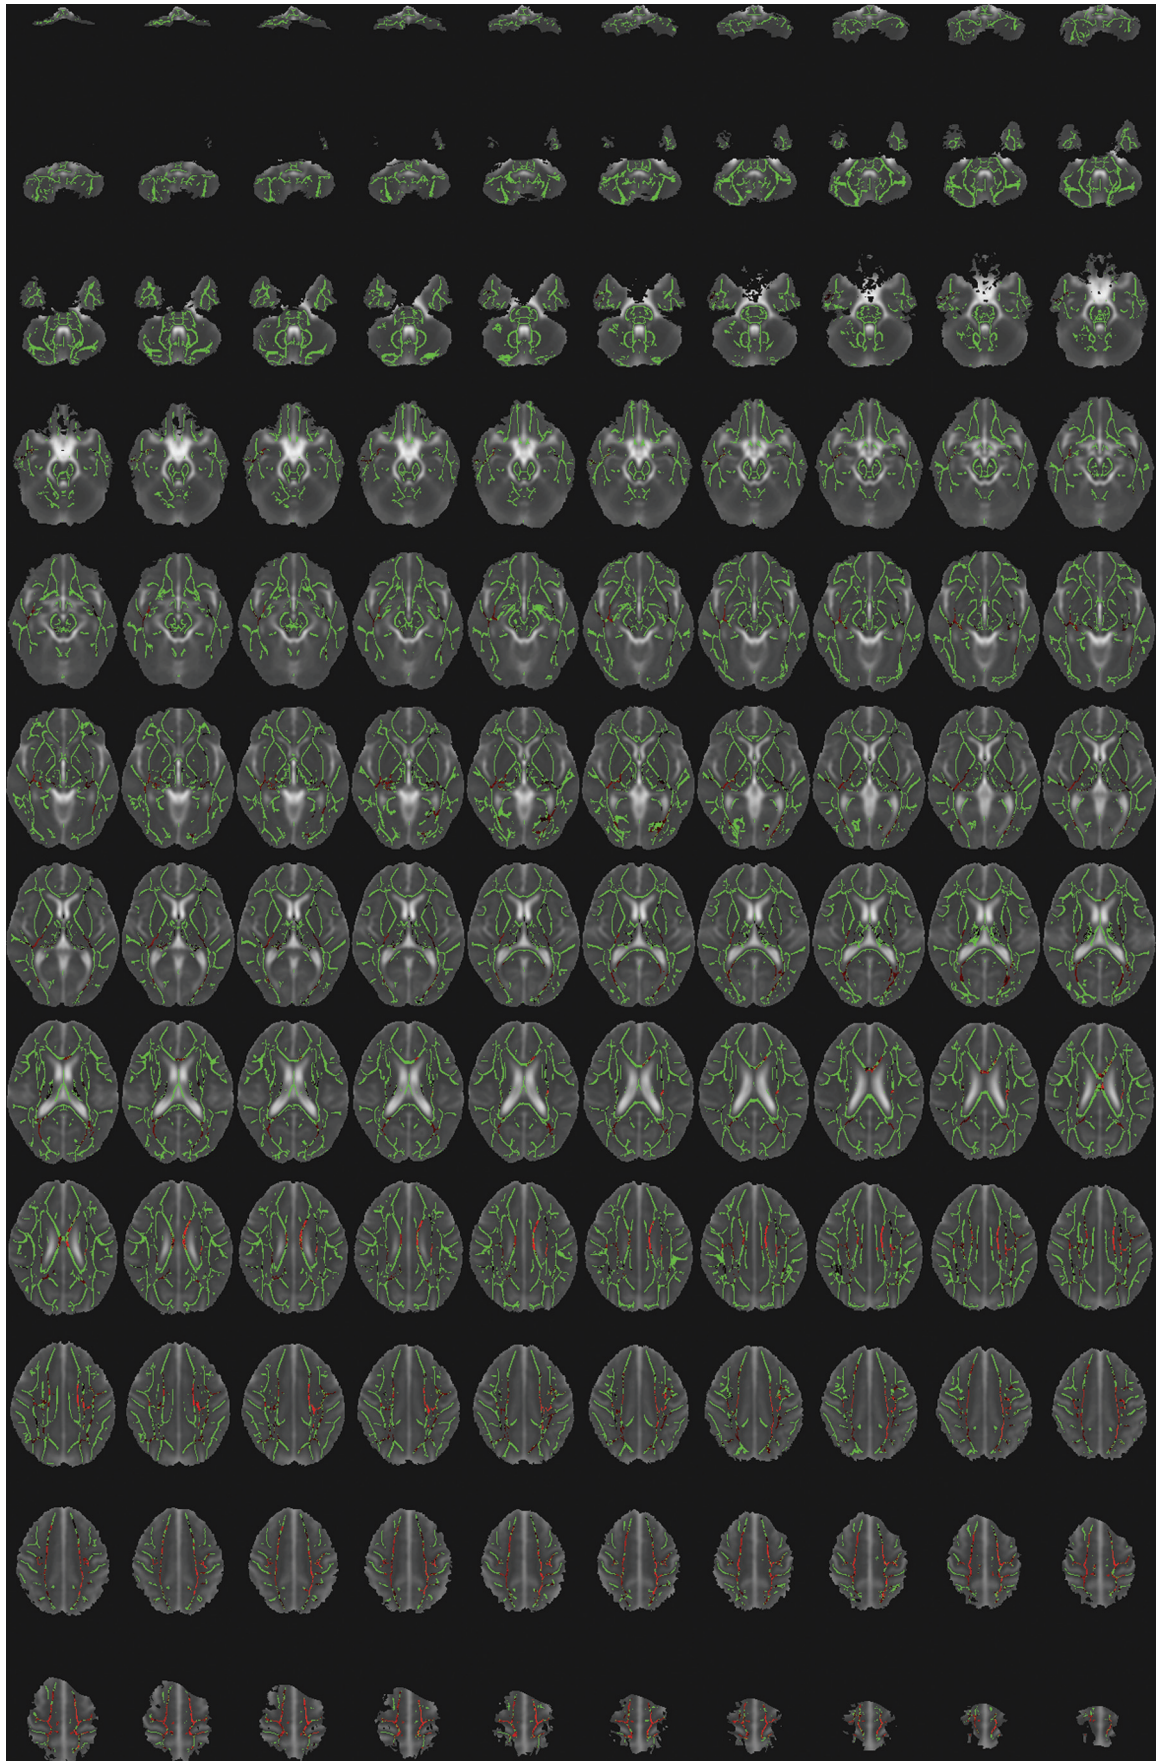

**ON-LINE FIG 6.** Pure OPA1-DOA MD > control MD: all axial sections.
